# Supplementary material for: Tuning the catalytic performance of CaSnO3 by developing an S-scheme p–n heterojunction through Ag6Si2O7 doping
Source: Royal Society of Chemistry journal article supplement (doi:10.1039/d3cy01151h), 2023-01-01
Supplement: d3cy01151h1.pdf [file d3cy01151h1.pdf]

## ELECTRONIC SUPPLEMENTARY INFORMATION

### Tuning the Catalytic Performance of $\text{CaSnO}_3$ by Developing S-Scheme P-N Heterojunction through $\text{Ag}_6\text{Si}_2\text{O}_7$ Doping

Navid Hussain Shah<sup>1</sup>, Muhammad Abbas<sup>2</sup>, Muhammad Sulman<sup>3</sup>, Muhammad Qasim<sup>4</sup>,  
Muhammad Imran<sup>4\*</sup>, Sohail Azmat<sup>5</sup>, Yanyan Cui<sup>\*</sup>, Yaling Wang<sup>1\*</sup>

*<sup>1,2</sup> \* Beijing Engineering Research Center of Mixed Reality and Advanced Display, School of Optics and Photonics, Beijing Institute of Technology, Beijing 100081, China*

*<sup>1\*</sup> CAS Key Laboratory for Biomedical effects of Nanomaterials and Nanosafety, National Center for Nanoscience and Technology of China, 100190, China*

*<sup>3</sup> School of Physics Beijing institute of Technology Beijing 100081, China*

*<sup>4\*</sup> Beijing key Laboratory of Environmental science & Engineering, School of Material science & Engineering, Beijing institute of Technology Beijing 100081, China*

*<sup>5</sup> Department of Chemistry, University of Bari Aldo Moro, Bari, Italy*

*\*<sup>1\*</sup> Correspondence: [cuiyanyan@bit.edu.cn](mailto:cuiyanyan@bit.edu.cn) (Y.C); [wangyl@nanoctr.cn](mailto:wangyl@nanoctr.cn) (Y.W);*

*Email:*

*[navidshah742@gmail.com](mailto:navidshah742@gmail.com)*

| Sr# | SAMPLE                                         | FWMH   | AVERAGE CRYSTALLINE SIZE D (nm) |
|-----|------------------------------------------------|--------|---------------------------------|
| 1   | CaSnO <sub>3</sub>                             | 0.1606 | 53.63596426                     |
| 2   | Ag <sub>6</sub> Si <sub>2</sub> O <sub>7</sub> | 0.5375 | 22.40214328                     |
| 3   | AgCS-F                                         | 0.2010 | 44.67589422                     |
| 4   | AgCS-G                                         | 0.2106 | 43.42165199                     |
| 5   | AgCS-H                                         | 0.4241 | 41.14970216                     |
| 6   | AgCS-I                                         | 0.5274 | 40.87710789                     |
| 7   | AgCS-J                                         | 0.5488 | 38.04289865                     |

**Table S1.** The average crystal size “D” and FWMH

**Table S2** BET-specific surface areas of the photocatalysts.

| Serial Number | Samples                                        | BET Surface Area (m <sup>2</sup> /g) |
|---------------|------------------------------------------------|--------------------------------------|
| 1             | CaSnO <sub>3</sub>                             | 2.2642                               |
| 2             | Ag <sub>6</sub> Si <sub>2</sub> O <sub>7</sub> | 2.5541                               |
| 3             | AgCS-F                                         | 5.3318                               |
| 4             | AgCS-G                                         | 7.1742                               |
| 5             | AgCS-H                                         | 5.4962                               |
| 6             | AgCS-I                                         | 6.2450                               |
| 7             | AgCS-J                                         | 8.7899                               |

**Table S3.** The bandgap of the  $\text{CaSnO}_3$  and  $\text{Ag}_6\text{Si}_2\text{O}_7$  and their composites

| Serial Number | Samples                            | Bandgap (eV) |
|---------------|------------------------------------|--------------|
| 1             | $\text{CaSnO}_3$                   | 3.73         |
| 2             | $\text{Ag}_6\text{Si}_2\text{O}_7$ | 2.31         |
| 3             | AgCS-F                             | 3.37         |
| 4             | AgCS-G                             | 3.36         |
| 5             | AgCS-H                             | 3.27         |
| 6             | AgCS-I                             | 3.22         |
| 7             | AgCS-J                             | 3.20         |

**Table S4.** The rate constants for the photocatalytic degradation of Rhodamine B for  $\text{Ag}_6\text{Si}_2\text{O}_7$ ,  $\text{CaSnO}_3$  and their composites under visible light irradiation.

| SAMPLE                             | K ( $\text{min}^{-1}$ ) |
|------------------------------------|-------------------------|
| $\text{CaSnO}_3$                   | 0.00203                 |
| $\text{Ag}_6\text{Si}_2\text{O}_7$ | 0.02044                 |
| AgCS-F                             | 0.02452                 |
| AgCS-G                             | 0.02167                 |
| AgCS-H                             | 0.04971                 |
| AgCS-I                             | 0.03737                 |
| AgCS-J                             | 0.04155                 |

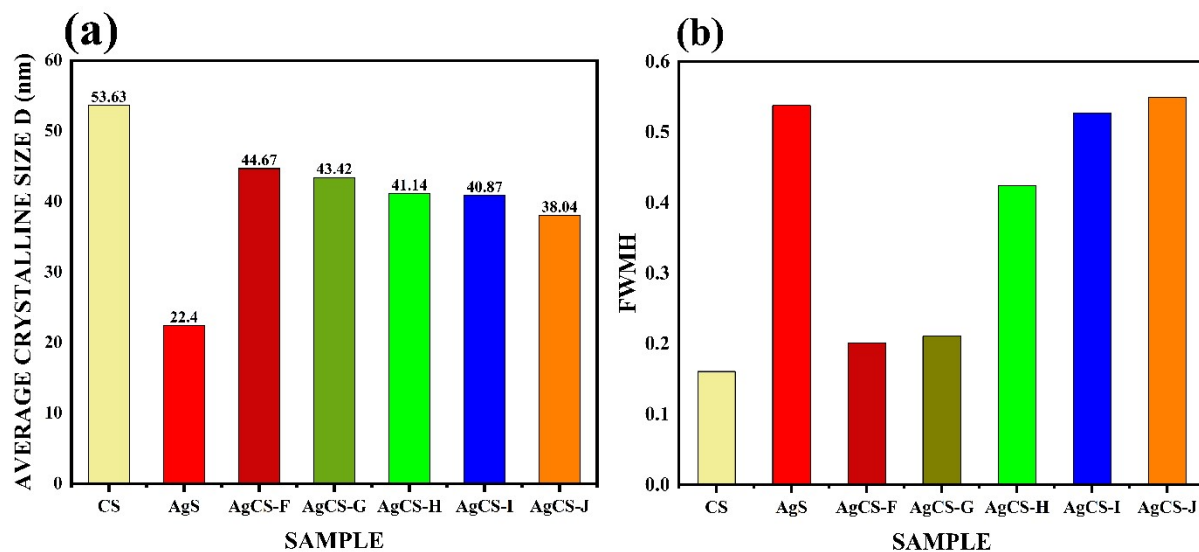**FIGURE S1** (a-b) The plots of average crystal size "D" and FWHM

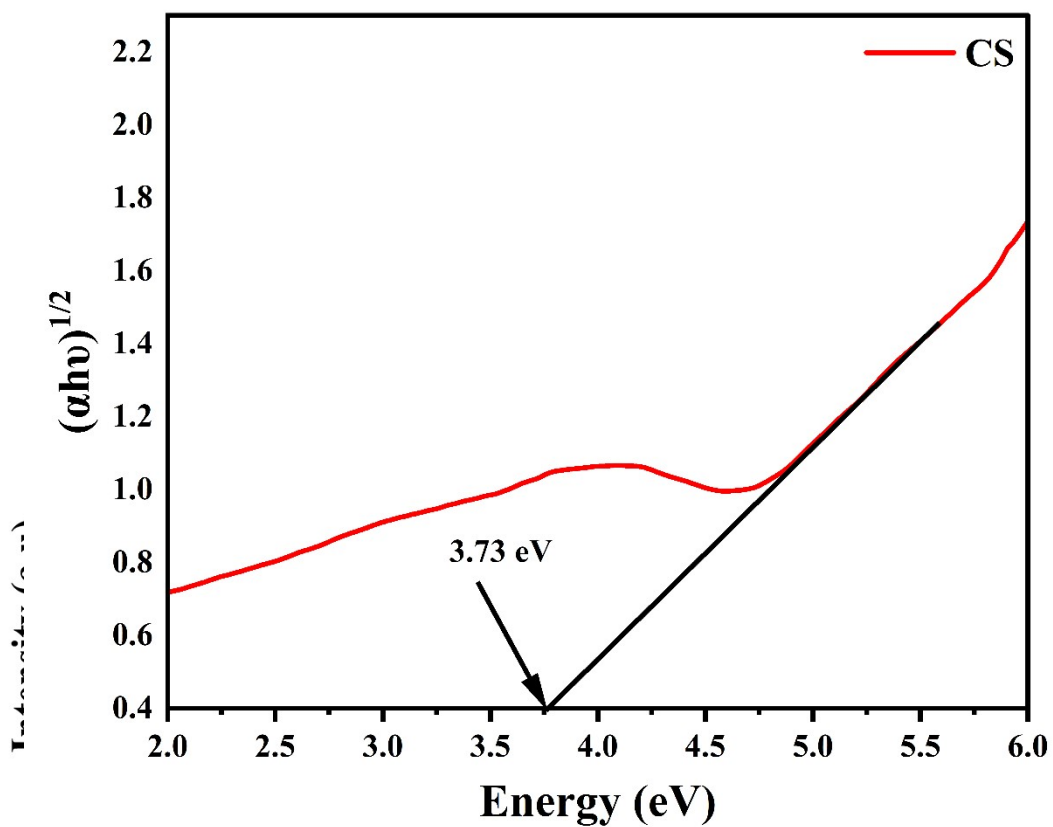

10 **FIGURE S2** The plots of  $(\alpha h\nu)^{1/2}$  versus  $(h\nu)$  for CS 70  
 2θ (Degree)

**FIGURE S3** The XRD spectra elucidate the stability and reusability of AgCS-H sample

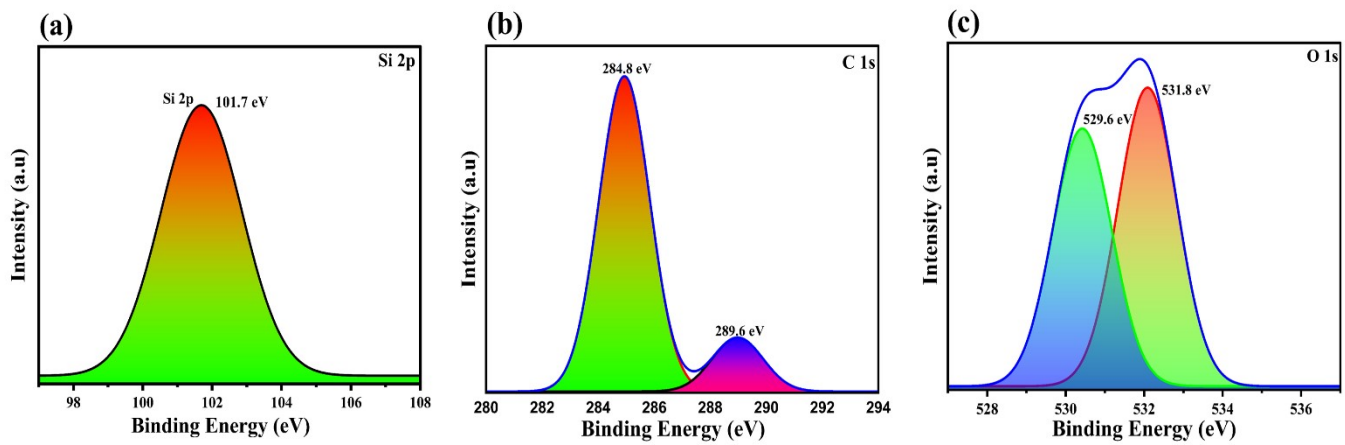

**FIGURE S4 (a,b,c)** The XPS Deconvolution high resolution spectra of Si, C and O.

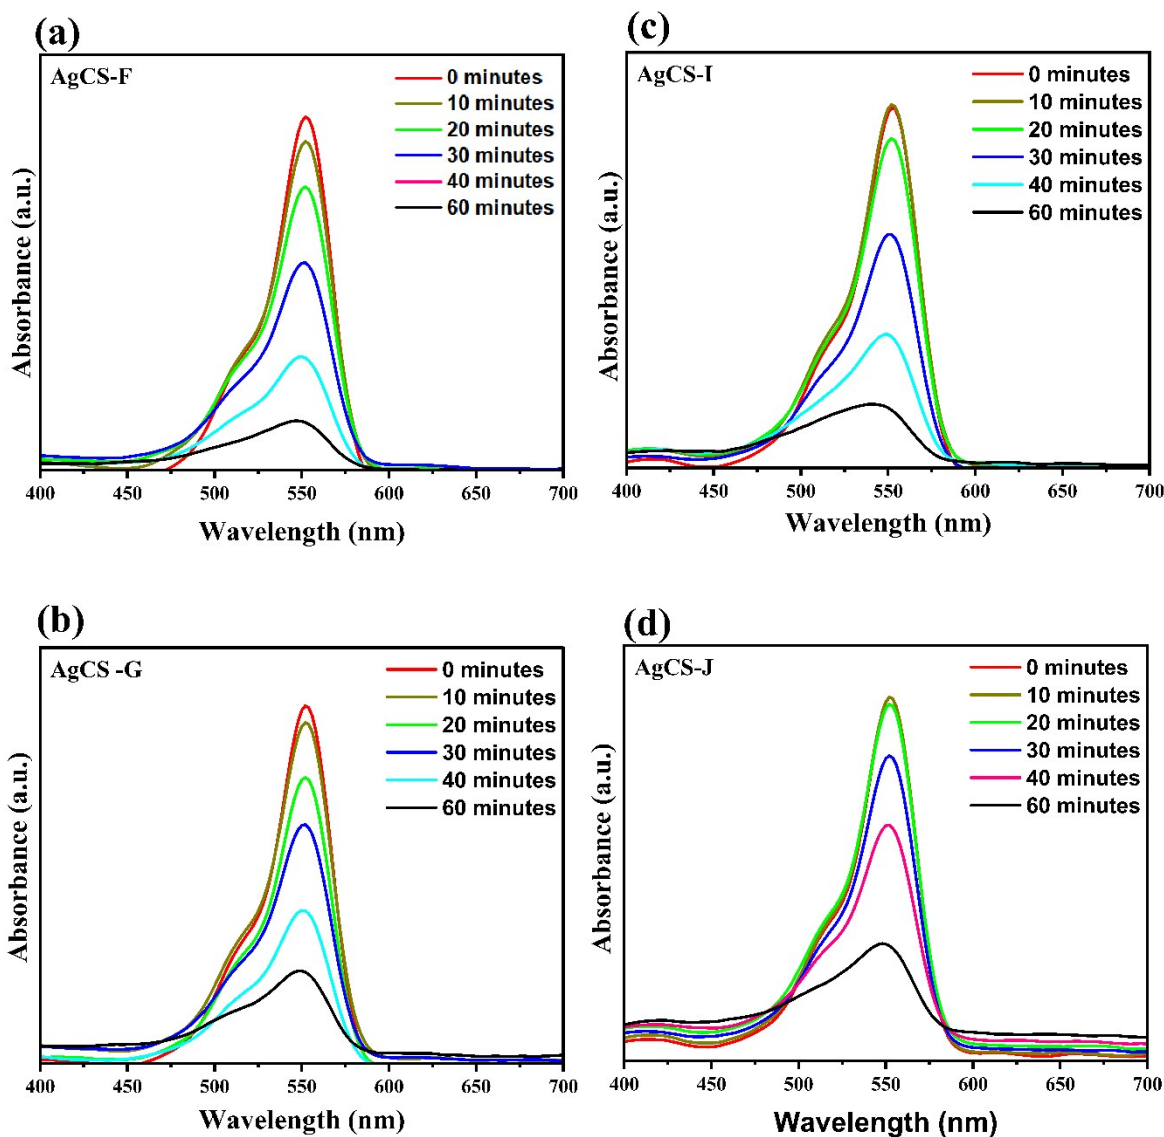

**FIGURE S5** (a-d) Plots of degradation of Rhodamine B graphs for AgS, CS and their composites

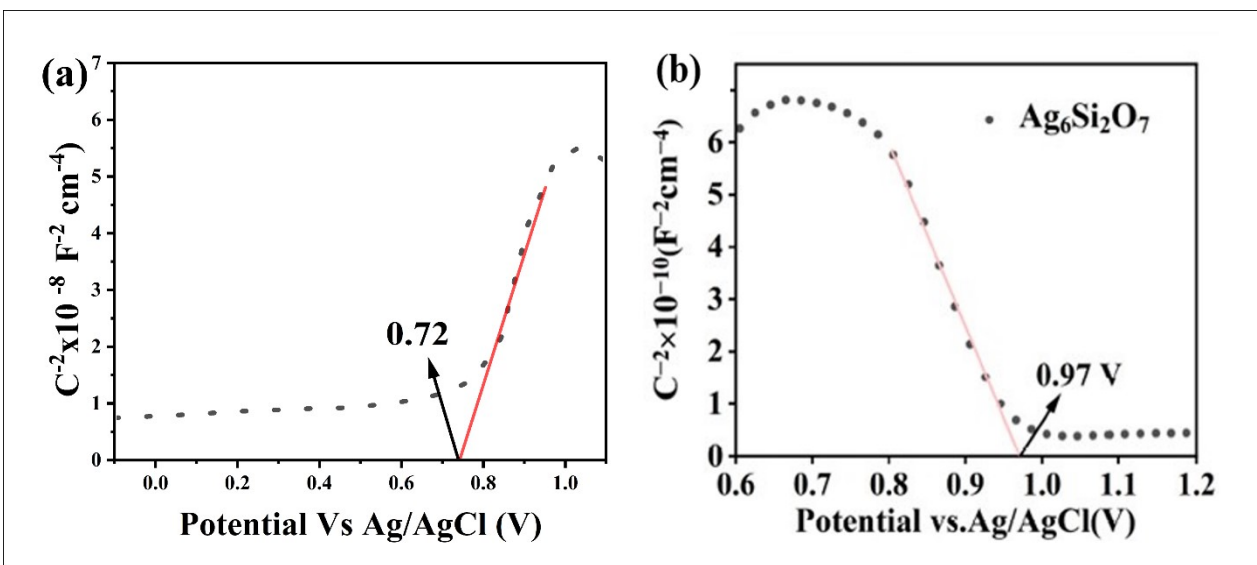

**FIGURE S6** (a-b) MS plots of samples (a) CaSnO<sub>3</sub> and (b) Ag<sub>6</sub>Si<sub>2</sub>O<sub>7</sub>

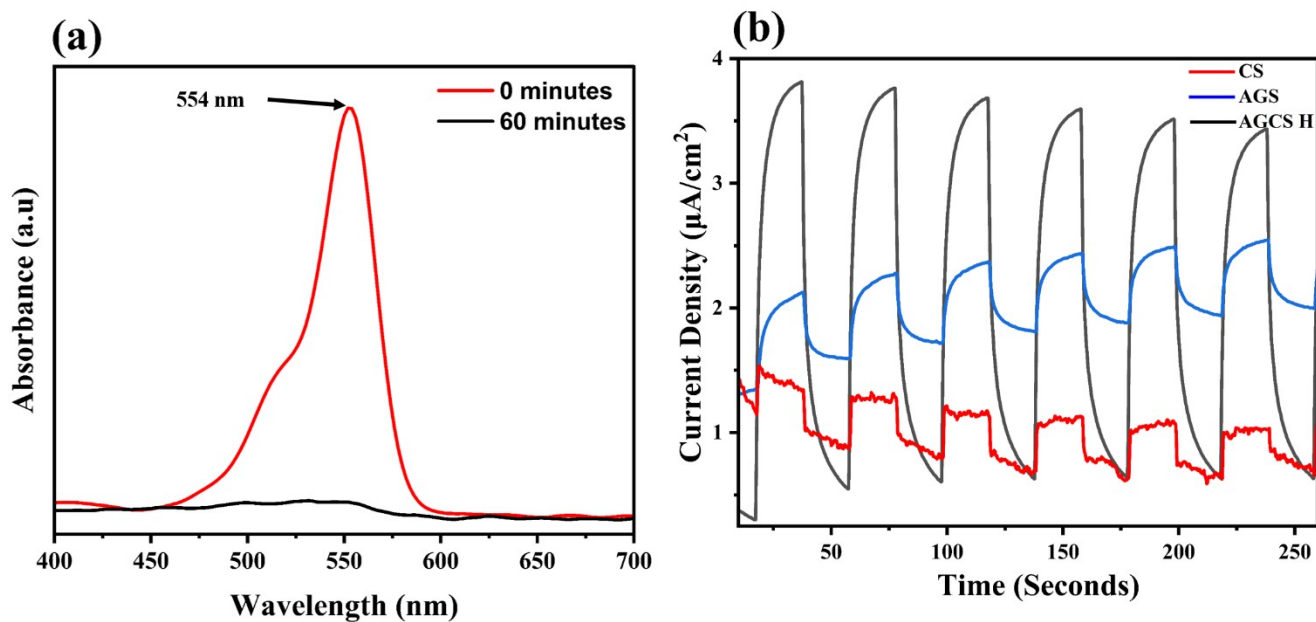

**FIGURE S7** (a) Plot of an eminent peak of absorption at 554 nm for RhB dye (b) the current density plot of CS, AgS and AgCS-H

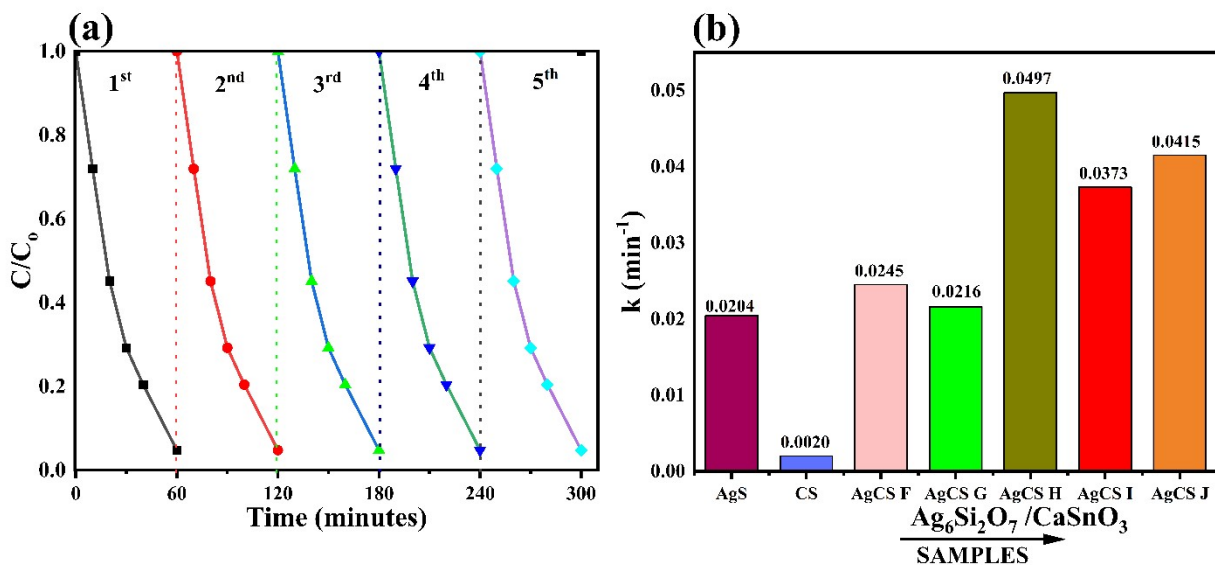

**Figure S8** (a) Cycling experiments and (b) rate constants for AgS, CS and their composites under visible light irradiation. ESR analysis of AgCS-H sample

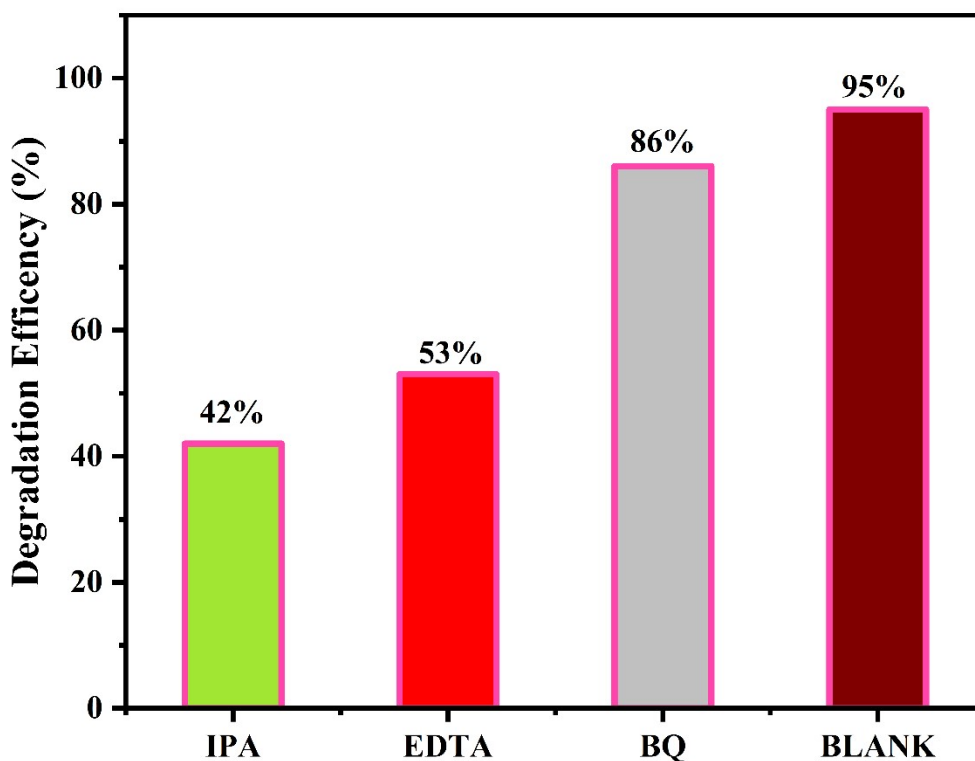

**Figure S9.** Photocatalytic activities of AGCS-H photocatalyst by different scavengers under UV-visible light irradiation.
